# Supplementary material for: Design, Fabrication and Characterization of Biodegradable Composites Containing Closo-Borates as Potential Materials for Boron Neutron Capture Therapy
Source: MDPI journal article supplement (doi:10.3390/polym14183864), 2022-09-15
Supplement: s1 [file s1]

Article

# Design, Fabrication and Characterization of Biodegradable Composites Containing *Closo*-Borates as Potential Materials for Boron Neutron Capture Therapy

Mariia Stepanova<sup>1,\*</sup>, Anatoliy Dobrodumov<sup>1</sup>, Ilia Averianov<sup>1</sup>, Iosif Gofman<sup>1</sup>, Juliya Nashchekina<sup>2</sup>, Ivan Guryanov<sup>3,\*</sup>, Ilya Klyukin<sup>4</sup>, Andrey Zhdanov<sup>4</sup>, Evgenia Korzhikova-Vlakh<sup>1,3</sup> and Konstantin Zhizhin<sup>4</sup>

<sup>1</sup> Institute of Macromolecular Compounds, Russian Academy of Sciences, St. Petersburg 199004, Russia

<sup>2</sup> Institute of Cytology, Russian Academy of Sciences, St. Petersburg 194064, Russia

<sup>3</sup> Institute of Chemistry, Saint-Petersburg State University, St. Petersburg 198504, Russia

<sup>4</sup> Kurnakov Institute of General and Inorganic Chemistry, Russian Academy of Sciences, Moscow 119991, Russia

\* Correspondence: maristepanova@hq.macro.ru (M.S.); ivan.guryanov1@gmail.com (I.G.)

## Supplementary Material

**Citations:** Stepanova, M.; Dobrodumov, A.; Averianov, I.; Gofman, I.; Nashchekina, J.; Guryanov, I.; Klyukin, I.; Zhdanov, A.; Korzhikova-Vlakh, E.; Zhizhin, K. Design, Fabrication and Characterization of Biodegradable Composites Containing *Closo*-Borates as Potential Materials for Boron Neutron Capture Therapy. *Polymers* **2022**, *14*, 3864. <https://doi.org/10.3390/polym14183864>

Academic Editor: Beom Soo Kim

Received: 29 July 2022

Accepted: 13 September 2022

Published: 15 September 2022

**Publisher's Note:** MDPI stays neutral with regard to jurisdictional claims in published maps and institutional affiliations.

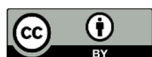

**Copyright:** © 2022 by the authors. Submitted for possible open access publication under the terms and conditions of the Creative Commons Attribution (CC BY) license (<https://creativecommons.org/licenses/by/4.0/>).

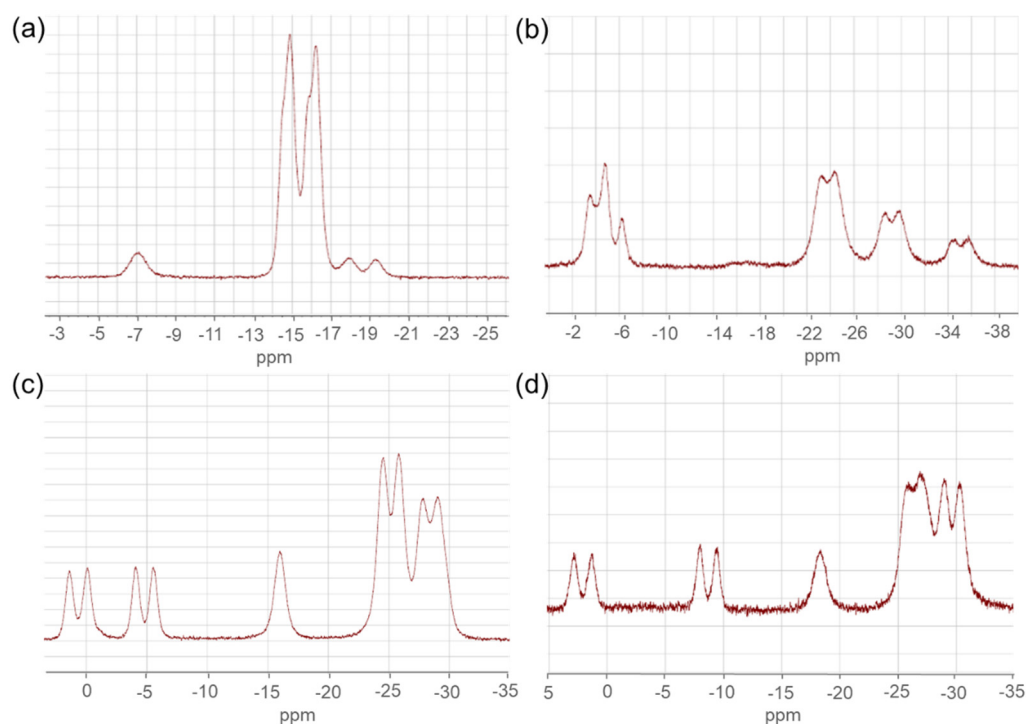

**Figure S1.** <sup>11</sup>B NMR spectra of used in adsorption *closo*-borates: Na[B<sub>12</sub>H<sub>11</sub>NH<sub>3</sub>] $\cdot$ 2H<sub>2</sub>O (a), Na<sub>2</sub>[B<sub>10</sub>H<sub>9</sub>OH] $\cdot$ 2H<sub>2</sub>O (b), Na[B<sub>10</sub>H<sub>9</sub>NH=C(NH<sub>2</sub>)CH<sub>3</sub>] $\cdot$ 2H<sub>2</sub>O (c), Na[B<sub>10</sub>H<sub>9</sub>NH=C(OH)CH<sub>3</sub>] $\cdot$ 2H<sub>2</sub>O (d). The analysis was performed for a solution of compounds in CD<sub>3</sub>CN at 96.32 MHz for <sup>11</sup>B.

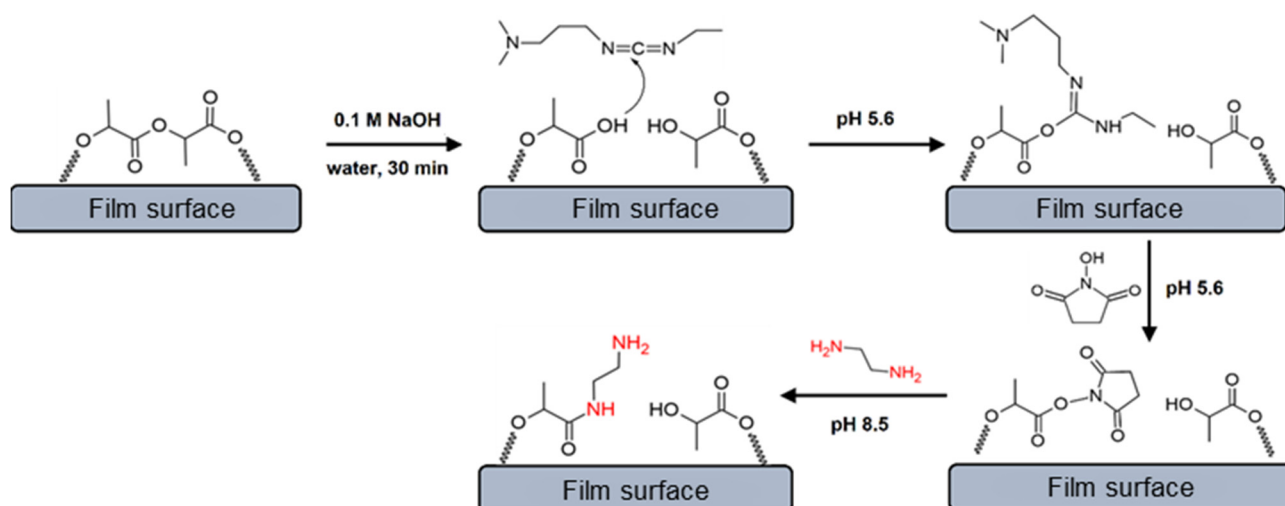

**Figure S2.** Scheme of the PDLLA surface hydrolysis and modification with ethylenediamine.

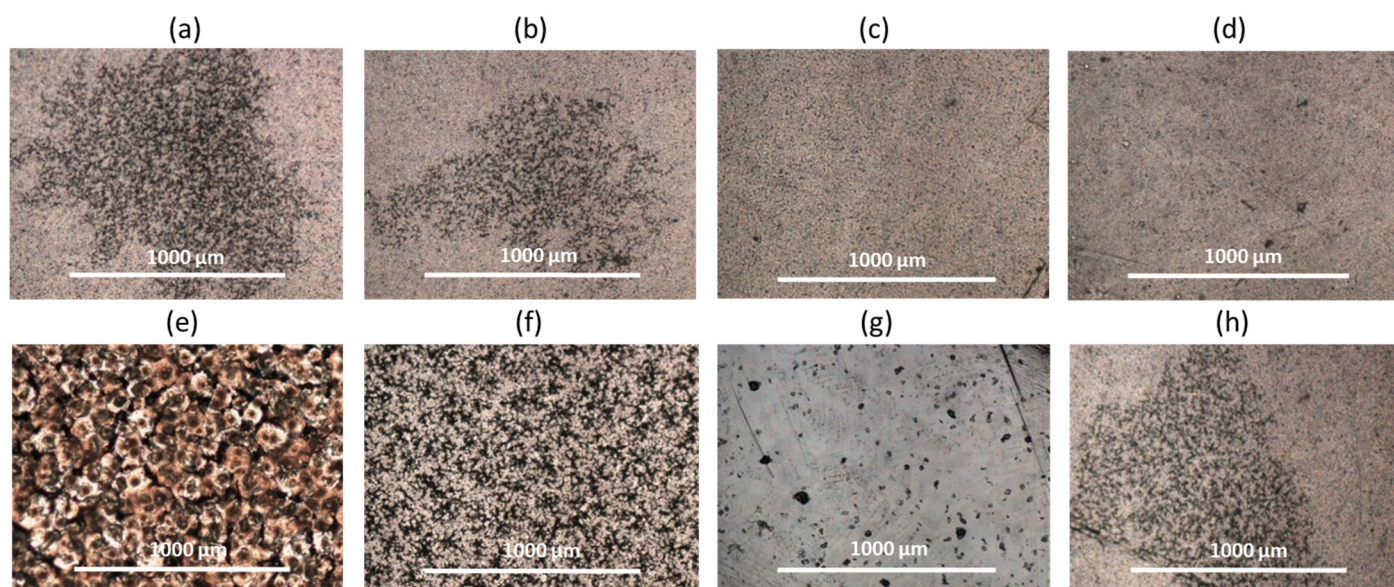

**Figure S3.** Images of some PDLLA and PCL films before and after  $\text{Na}_2[\text{B}_{10}\text{H}_9\text{OH}]$  adsorption (optical microscopy,  $\times 4$ ): PCL (image of a region with a higher degree of crystallinity) before adsorption (a), PCL with carboxyl and hydroxyl groups before (b) and after (h) adsorption, PCL-EDA after adsorption (c), PCL-PLys after adsorption (d), PCL/P(Lys-co-Leu) before adsorption (e), PCL/P(Lys-co-Phe) before adsorption (f) and PDLLA with carboxyl and hydroxyl groups after adsorption (g).

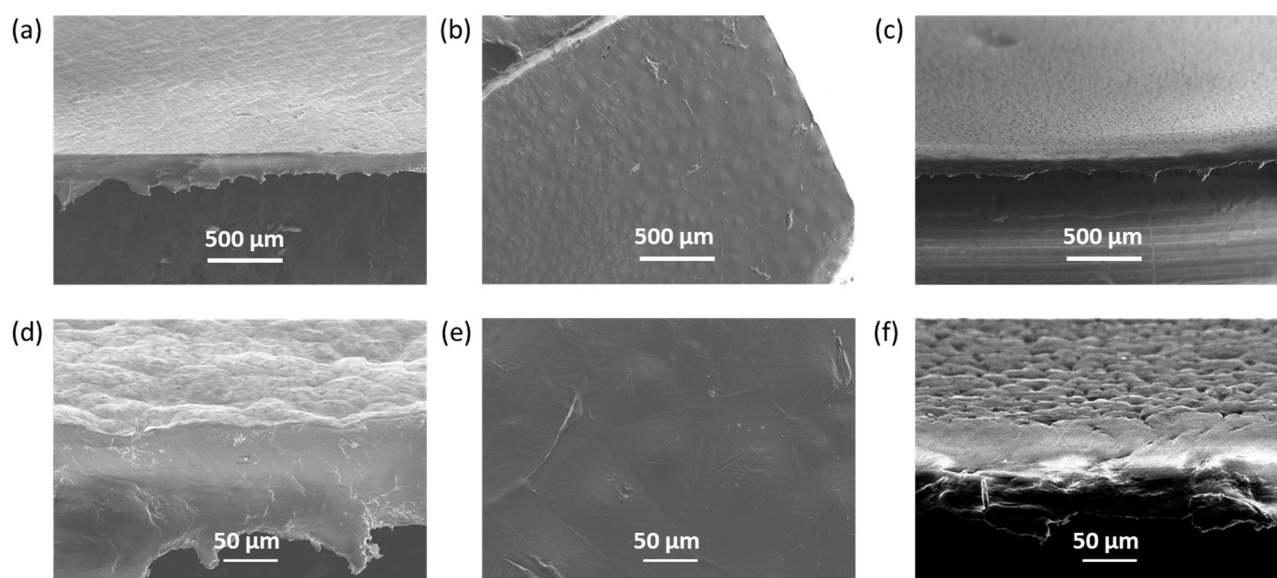

**Figure S4.** SEM images of pristine and composite PCL/polypeptide films with different magnification (x100, x500): PCL (a, d), PCL/P(Lys-co-Leu) (b, e) and PCL/P(Lys-co-Phe) (c, f).

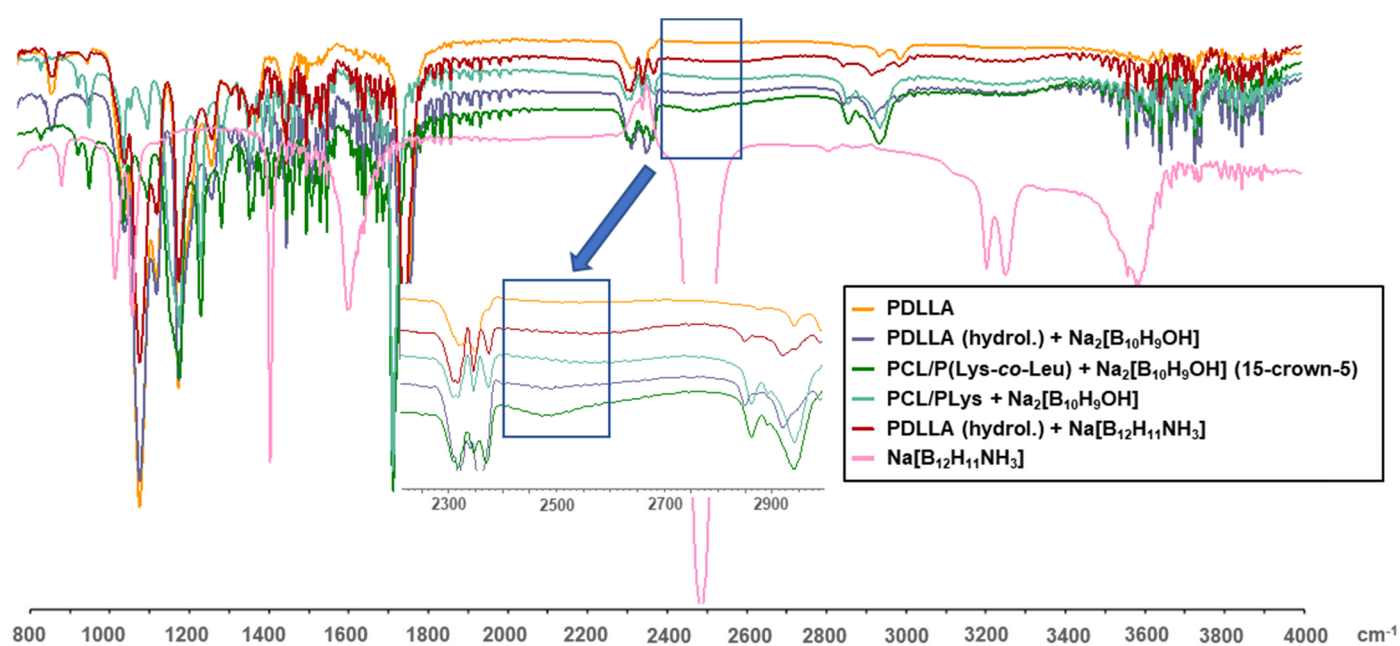

**Figure S5.** Examples of attenuated total reflection-Fourier transform infrared (ATR-FTIR) spectra of obtained film materials before and after adsorption of *closo*-borates on their surface in comparison with the ATR-FTIR spectrum of Na[B<sub>12</sub>H<sub>11</sub>NH<sub>3</sub>].



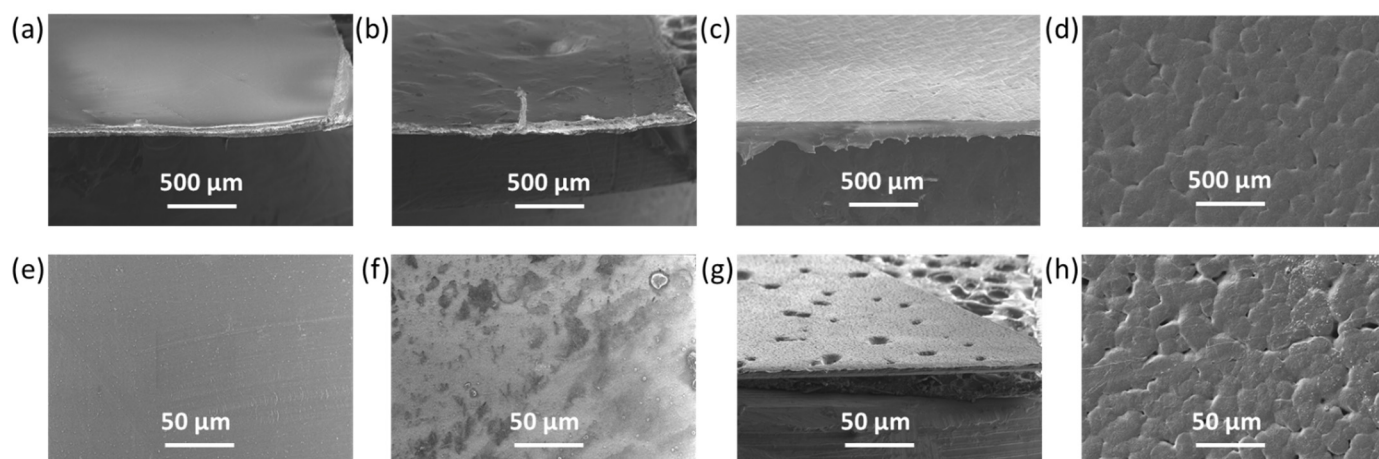

**Figure S6.** SEM images of pristine and composite PDLLA and PCL films containing dispersed *closo*-borate with different magnification (x100, x1000): PDLLA (a, e), PDLLA+5 wt% Na[B<sub>12</sub>H<sub>11</sub>NH<sub>3</sub>] (b, f), PCL (c, g) and PCL+5 wt% Na[B<sub>12</sub>H<sub>11</sub>NH<sub>3</sub>] (d, h).

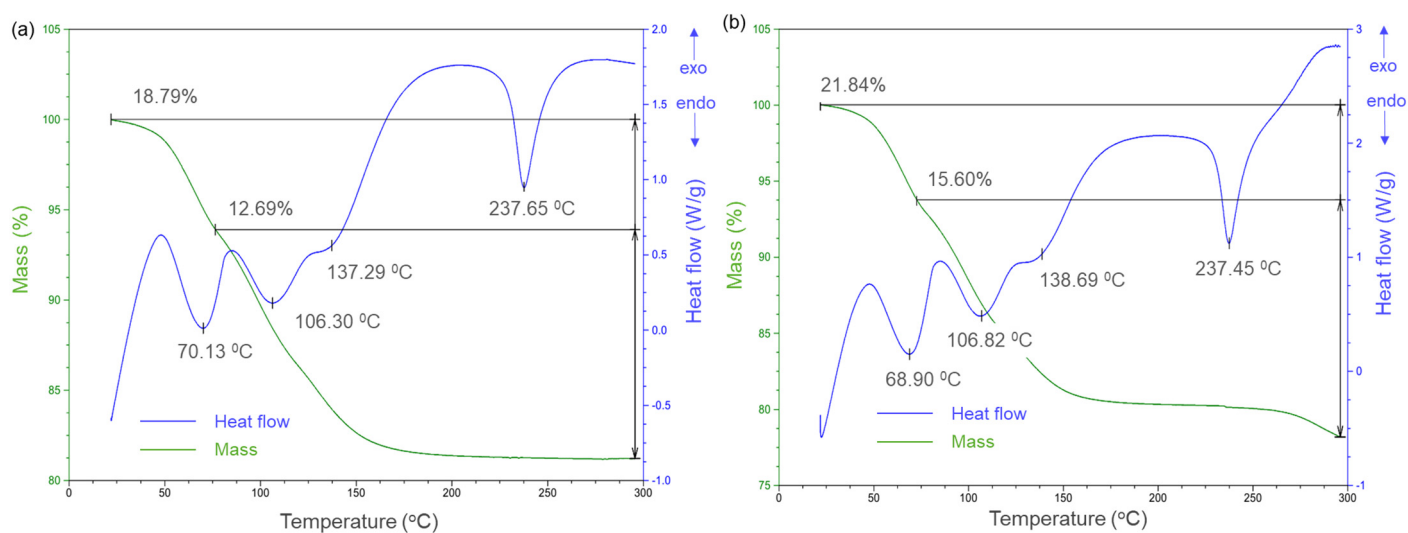

**Figure S7.** TGA-DSC curves for Na[B<sub>12</sub>H<sub>11</sub>NH<sub>3</sub>]: (a) argon atmosphere, (b) air atmosphere.

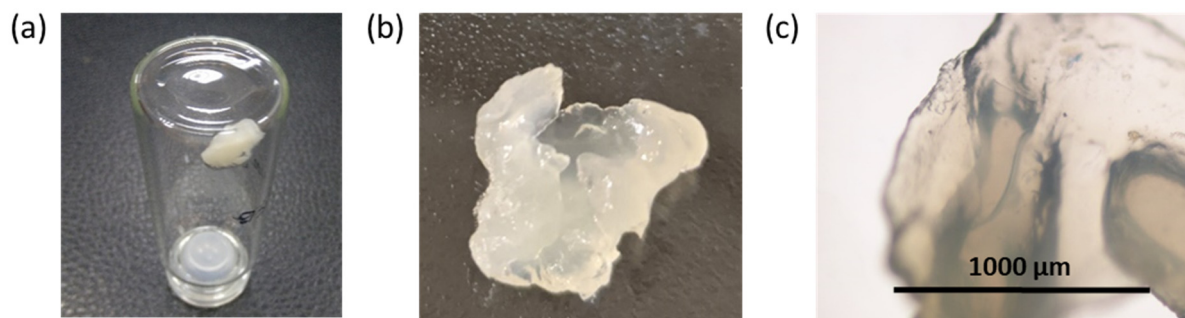

**Figure S8.** Images of alginate-gelatin hydrogel loaded with 5 wt% Na[B<sub>12</sub>H<sub>11</sub>NH<sub>3</sub>]: photo (a, b) and optical microscopy (x4) (c).

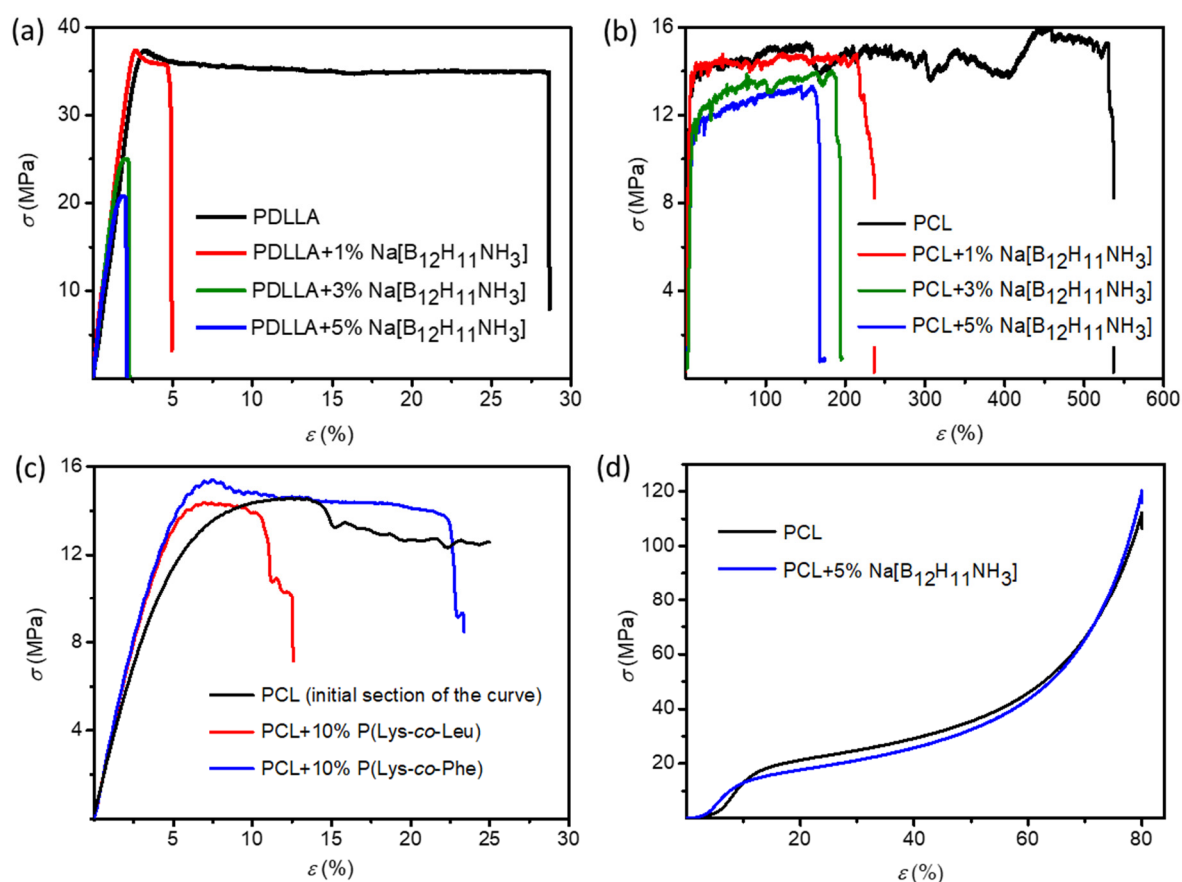

**Figure S9.** Tensile stress-strain curves for pristine and composite PDLLA and PCL films with Na[B<sub>12</sub>H<sub>11</sub>NH<sub>3</sub>] or polypeptide (a–c) and compression stress-strain curves for monolithic PCL sample and its composite with Na[B<sub>12</sub>H<sub>11</sub>NH<sub>3</sub>].

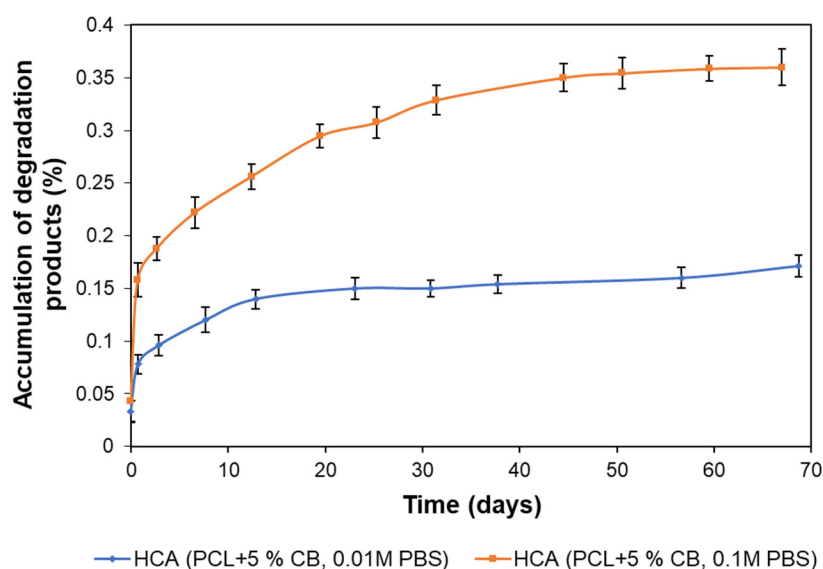

**Figure S10.** Profiles of accumulation of 6-hydroxycaproic acid (HCA) produced during degradation of PCL-based composite films obtained in sodium phosphate buffer with 0.15 mol/L NaCl (PBS, pH 7.4) with different buffer capacity. Conditions: 0.01 M or 0.1 M PBS in presence of lipase, 37 °C, monitoring by <sup>1</sup>H NMR spectroscopy.

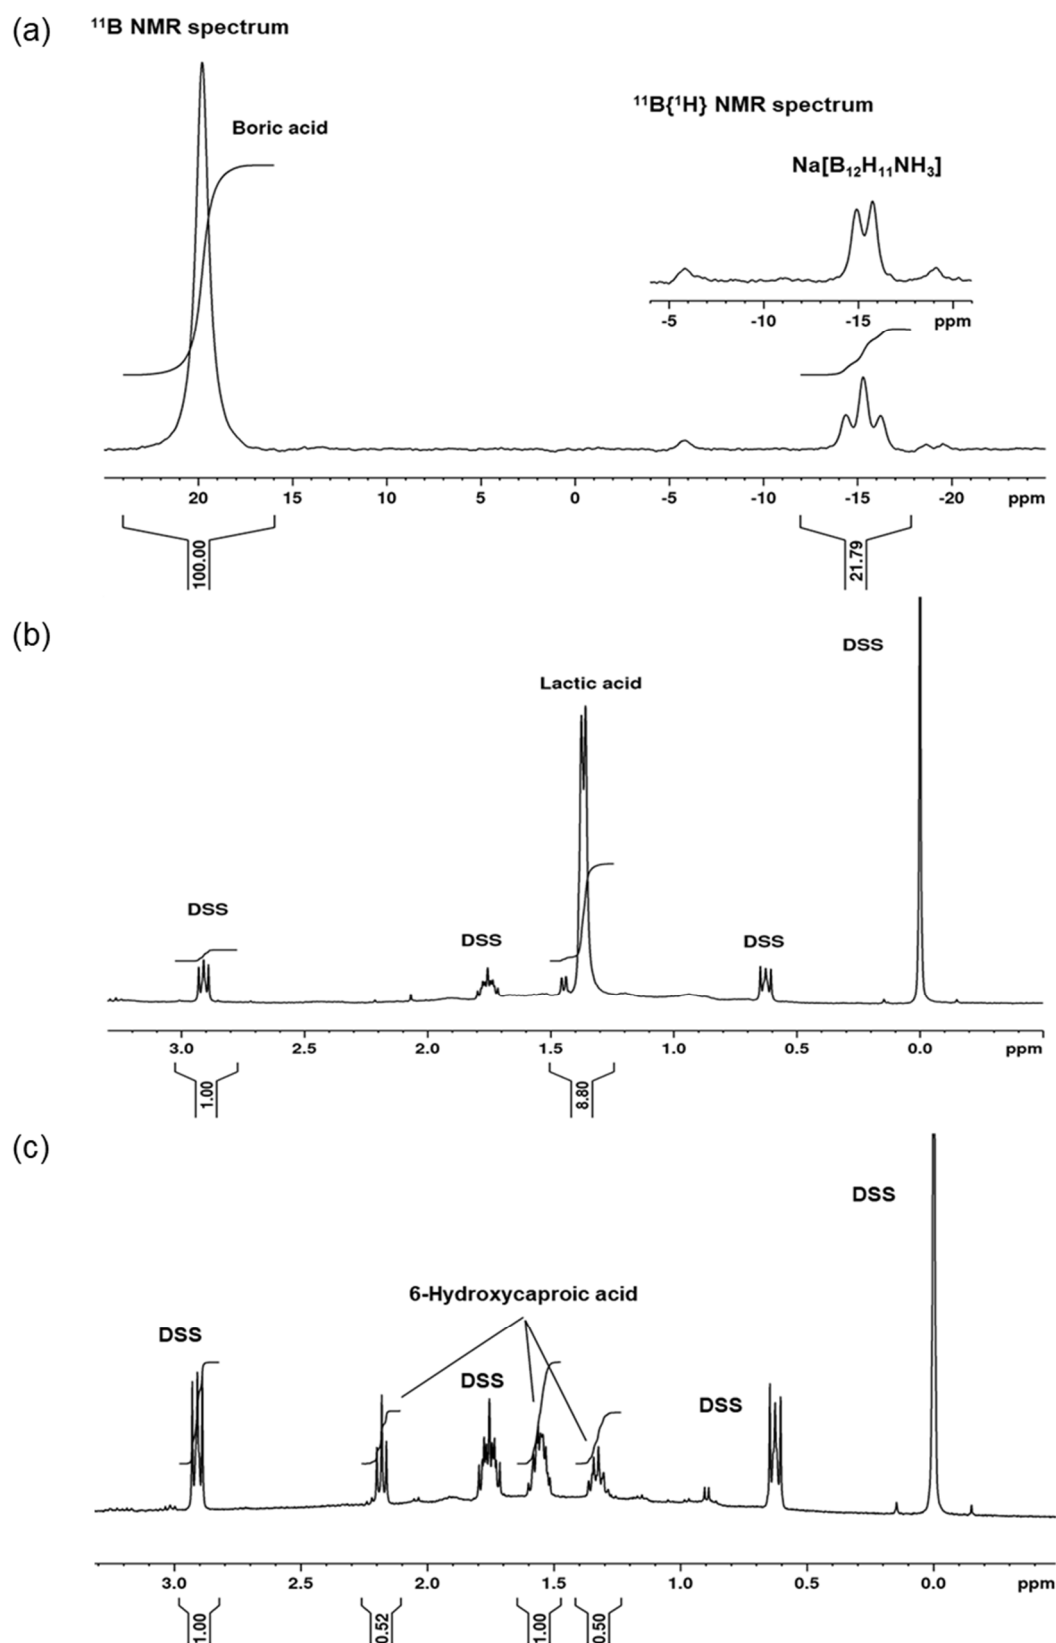

**Figure S11.** NMR spectra examples of degradation of PDLLA or PCL films filled with 5 wt%  $\text{Na}[\text{B}_{12}\text{H}_{11}\text{NH}_3]$  in model physiological solution (pH 7.4, in presence of lipase, 37 °C): (a) release of *closo*-borate, (b) accumulation of lactic acid (from PDLLA) and (c) accumulation of 6-hydroxycaproic acid (from PCL). The analysis was performed with the use  $\text{D}_2\text{O}$  as a solvent at 400.13 and 128.378 MHz for  $^1\text{H}$  and  $^{11}\text{B}/^{11}\text{B}\{^1\text{H}\}$ , respectively.

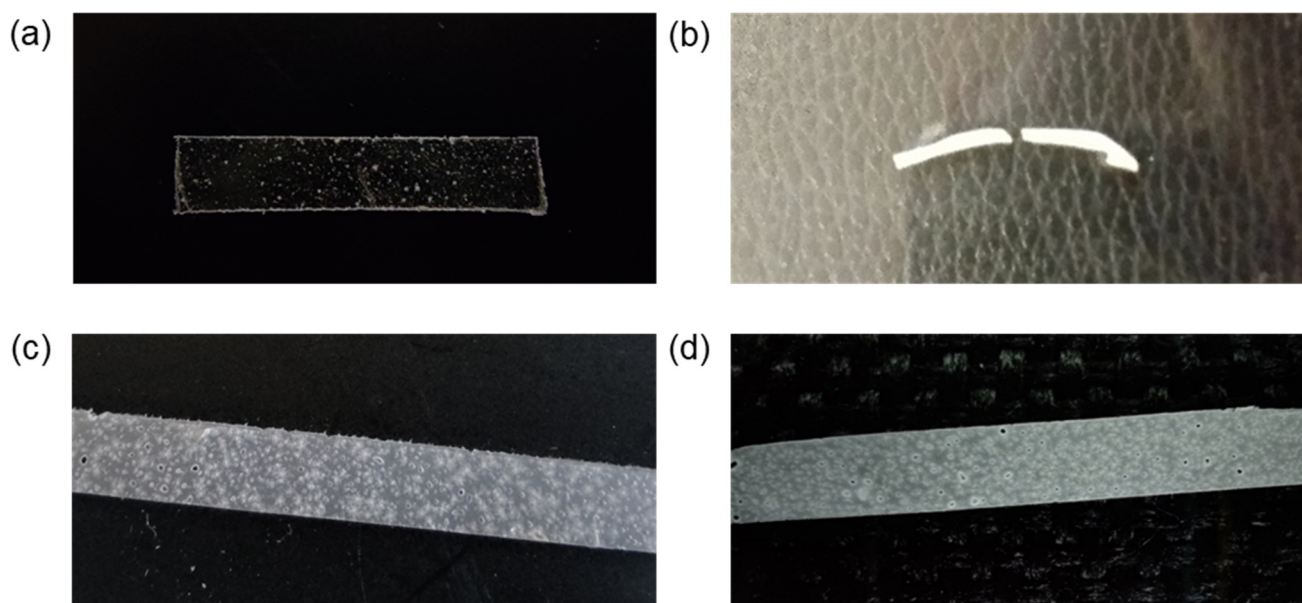

**Figure S12.** Photos of film samples based on PDLLA + 5 wt% Na[B<sub>12</sub>H<sub>11</sub>NH<sub>3</sub>] before degradation (a), after 67 days of degradation (b) and based on PCL + 5 wt% Na[B<sub>12</sub>H<sub>11</sub>NH<sub>3</sub>] before degradation (c) and after 67 days of degradation (d). Conditions: 0.1 M PBS, 37°C, in presence of lipase.
